# Supplementary material
Source: PubMed Central journal article supplement (PMC6880891)

## Supplementary Methods

### *Detection of the ETV6-NTRK3 fusion*

After extraction of ribonucleic acid (RNA) from the leukemic cells, 1385 cancer-associated target genes were amplified via a Next Generation Sequencing-based RNA panel (TruSight RNA Pan-Cancer Panel, Illumina) and sequenced on an Illumina MiSeq machine. For detection of fusion genes in the measured sequences, the following BaseSpace Apps were used in the BaseSpace Sequencing Hub (Illumina): RNA-Seq alignment (Illumina) and TopHat alignment (Illumina). The ETV6 break-apart probe was obtained from Abbott.

### *MRD analysis*

MRD measurements in bone marrow samples were performed using real-time quantitative PCRs for three Ig/TCR markers with the following sensitivities and quantitative ranges (QR): 1) Vd2-Dd3, sensitivity and QR  $1 \times 10^{-4}$ ; 2) Vk2D26-Kde, sensitivity  $1 \times 10^{-4}$  and QR  $5 \times 10^{-4}$ ; 3) VH1.2\*02-JH3b, sensitivity  $1 \times 10^{-5}$  and QR  $1 \times 10^{-4}$ . For MRD assessments in the cerebrospinal fluid (CSF), genomic deoxyribonucleic acid (DNA) was prepared using the NucleoSpin Plasma XS-Kit (Macherey-Nagel) suitable for small sample sizes. MRD was analyzed by PCR of the three Ig/TCR-genes after normalization with albumin. Data interpretation was based on the Euro-MRD ALL guidelines<sup>1</sup>, however these were not formally applied due to a lower DNA input. MRD values in the CSF were therefore expressed as “negative” or “positive” and not as quantitative values.

### *Preclinical in vivo experiment with larotrectinib*

NOD.Cg-Prkdcscid Il2rgtm1Wjl/SzJ (NSG) mice were purchased from Charles River, bred and maintained in accordance with governmental regulations. After informed consent, secondary NSG xenograft mice were generated by intravenous injection of  $1 \times 10^6$  leukemic cells derived from primary PDX material from this patient and flow cytometric monitoring of human blasts in the murine peripheral blood was performed as previously described<sup>2</sup>. Endpoints for terminating an experiment were defined using clinical scores as approved by authorities (“MELUND” of Schleswig-Holstein, Germany, V242–45475/2019(54-5/16)).

Larotrectinib was obtained from Hycultec, dissolved as previously described<sup>3</sup> and applied at a dose of 200 mg/kg daily by oral gavage<sup>3</sup>.

### References for Supplementary Methods

1. van der Velden VH, Cazzaniga G, Schrauder A, et al. Analysis of minimal residual disease by Ig/TCR gene rearrangements: guidelines for interpretation of real-time quantitative PCR data. *Leukemia*. 2007;21(4):604-611. Prepublished on 2007/02/09 as DOI 10.1038/sj.leu.2404586.
2. Schewe DM, Alsadeq A, Sattler C, et al. An Fc engineered CD19 antibody eradicates MRD in patient-derived MLL-rearranged acute lymphoblastic leukemia xenografts. *Blood*. 2017. Prepublished on 2017/07/13 as DOI 10.1182/blood-2017-01-764316.
3. Roberts KG, Janke LJ, Zhao Y, et al. ETV6-NTRK3 induces aggressive acute lymphoblastic leukemia highly sensitive to selective TRK inhibition. *Blood*. 2018;132(8):861-865. Prepublished on 2018/06/09 as DOI 10.1182/blood-2018-05-849554.

## Supplemental Figure 1

Bone marrow (BM) and CSF minimal residual disease (MRD) status during the treatment course as assessed by polymerase chain reaction (PCR) for patient-specific Ig/TCR rearrangements. Day 0 is the day of first relapse post-HSCT. †One target. ‡Two targets. BM, bone marrow; CSF, cerebrospinal fluid; MRD, minimal residual disease; PCR, polymerase chain reaction.

| Days since first relapse | BM-MRD by PCR<br>(3 targets) | CSF-MRD by<br>PCR (3 targets) |
|--------------------------|------------------------------|-------------------------------|
| <b>First relapse</b>     |                              |                               |
| 0                        | Morphological blasts         | Morphological blasts          |
| 16                       | -                            | No signal                     |
| 44                       | -                            | Positive                      |
| 50                       | Negative                     | Morphological blasts          |
| <b>Second relapse</b>    |                              |                               |
| 64                       | $10^{-3}$                    | -                             |
| 72                       | $10^{-4} / 10^{-6\dagger}$   | -                             |
| 79                       | -                            | No signal                     |
| 91                       | $10^{-4}$                    | No signal                     |
| 106                      | $10^{-3}$                    | Positive                      |
| 113                      | Negative / $10^{-6\dagger}$  | Positive                      |
| 121                      | Negative                     | No signal                     |
| 128                      | Negative                     | No signal                     |
| 134                      | Negative / $10^{-6\dagger}$  | No signal                     |
| 143                      | Negative                     | No signal                     |
| 156                      | Negative                     | No signal                     |
| 163                      | Negative / $10^{-6\dagger}$  | No signal                     |
| 170                      | Negative                     | No signal                     |
| <b>Third relapse</b>     |                              |                               |
| 207                      | -                            | Morphological blasts          |
| 211                      | Negative / $10^{-6\dagger}$  | Positive                      |
| 219                      | Negative / $10^{-6\dagger}$  | -                             |
| 232                      | Negative / $10^{-6\dagger}$  | -                             |
| 240                      | $10^{-6}$                    | Positive                      |
| 246                      | -                            | Positive                      |
| 249                      | -                            | Positive                      |
| 253                      | Negative                     | Positive                      |
| 261                      | -                            | No signal <sup>‡</sup>        |
| 267                      | -                            | positive <sup>†</sup>         |
| 268                      | -                            | -                             |
| 274                      | -                            | No signal                     |
| 281                      | Negative                     | No signal                     |
| 295                      | Negative                     | No signal                     |
| 309                      | Negative                     | No signal                     |
| 319                      |                              | No signal                     |

**Supplemental Figure 2**

Original flow cytometry plots from the xenograft experiment depicted in Figure 1C.

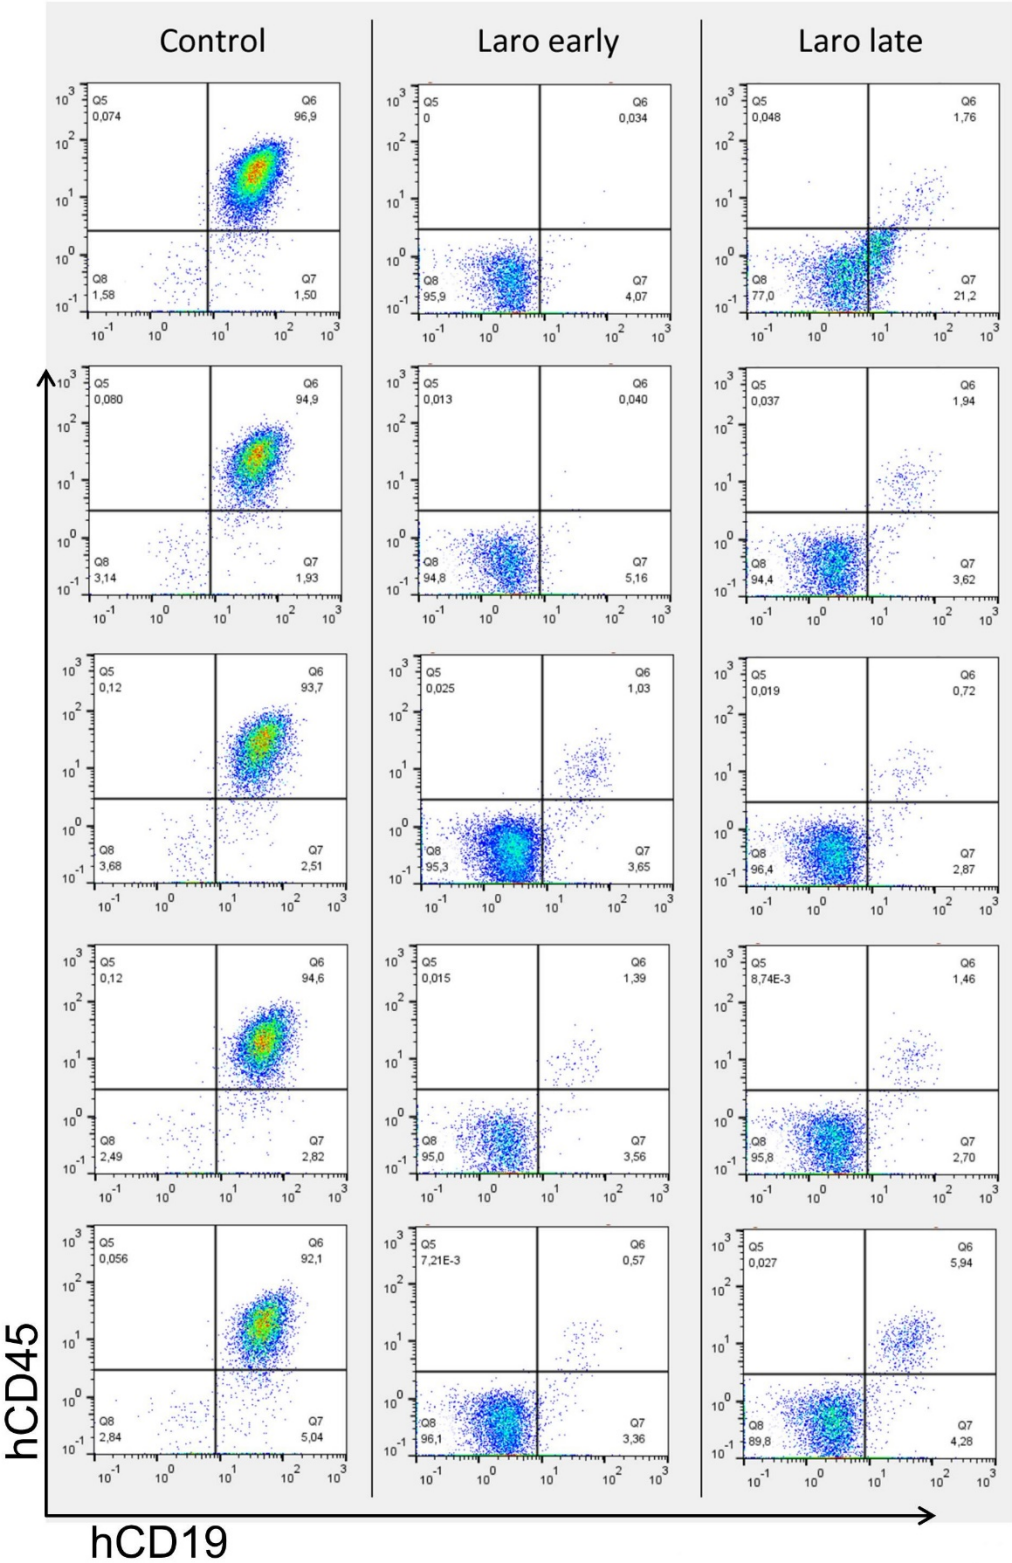

Supplement: baADV2019000700-suppl1.pdf [file baADV2019000700-suppl1.pdf]
